# Supplementary material for: A Meta-Analysis of Cognitive Remediation for Schizophrenia: Methodology and Effect Sizes
Source: Atypon-hosted journal article supplement (doi:10.1176/appi.ajp.2010.10060855), 2011-03-15

# Annex A

**Table 1: List of assessments in each neuropsychological domain, symptoms and function. New additions since McGurk et al. 2007 are in italics.**

|                                                                                                                                                                                                                                                                                                                                                                                                                                                                                              |                                                                                                                                                                                                                                                                                                                                                                                                                                                                                                                                                                                       |                                                                                                                                                                                                                                                                                                                                                                                                                                                                                                                                      |                                                                                                                                                                                                                                                                                                                                                                                                                                                                                                                                                                                                                                                                                                                                                                                                                                                                                                                           |
|----------------------------------------------------------------------------------------------------------------------------------------------------------------------------------------------------------------------------------------------------------------------------------------------------------------------------------------------------------------------------------------------------------------------------------------------------------------------------------------------|---------------------------------------------------------------------------------------------------------------------------------------------------------------------------------------------------------------------------------------------------------------------------------------------------------------------------------------------------------------------------------------------------------------------------------------------------------------------------------------------------------------------------------------------------------------------------------------|--------------------------------------------------------------------------------------------------------------------------------------------------------------------------------------------------------------------------------------------------------------------------------------------------------------------------------------------------------------------------------------------------------------------------------------------------------------------------------------------------------------------------------------|---------------------------------------------------------------------------------------------------------------------------------------------------------------------------------------------------------------------------------------------------------------------------------------------------------------------------------------------------------------------------------------------------------------------------------------------------------------------------------------------------------------------------------------------------------------------------------------------------------------------------------------------------------------------------------------------------------------------------------------------------------------------------------------------------------------------------------------------------------------------------------------------------------------------------|
| <p><b>Attention/vigilance</b><br/> Wechsler Memory Scale (WMS) information and mental control subtests<br/> Search-a-Word<br/> Cancellation tasks<br/> Continuous Performance Tests<br/> Span of apprehension<br/> Labyrinth Test<br/> Sustained Attention Test<br/> Span: hits, time, and overall<br/> Preattentional processing<br/> Cross-over reaction time<br/> Cross-modal reaction time<br/> Embedded Figures Test<br/> COGLAB apprehension/masking<br/> Dichotic listening tasks</p> | <p><b>Reasoning and problem solving</b><br/> WAIS, WAIS-R, or WAIS-III similarities and picture arrangement subtests<br/> Wechsler Intelligence Scale for Children mazes subtest<br/> Stroop Test interference condition<br/> Independent Living Scale—problem solving<br/> Gorham’s Proverbs Test and other proverb interpretation tasks<br/> Wisconsin Card Sorting Test<br/> Trail Making Test (B – A)<br/> Hinting Task<br/> Labyrinth Test<br/> Tower of Hanoi<br/> Tower of London<br/> Response inhibition<br/> Six elements<br/> Categories<br/> COGLAB card sorting test</p> | <p><b>Visual learning and memory</b><br/> WMS, WMS-R, or WMS-III visual recall, visual reproduction, faces, and figural memory subtests<br/> Rey-Osterrieth Complex Figure Test<br/> Kimura recurring figures<br/> Denman Neuropsychological Memory Test</p> <p><b>Social cognition</b><br/> Social perception (Emotion Matching Test and Emotion Labeling Test)<br/> Bell-Lysaker Emotion Recognition Test<br/> Social cognition<br/> <i>Mayer-Salovey-Caruso Emotional Intelligence - Emotional intelligence quotient (EQ)</i></p> | <p><b>Function</b><br/> Bay Area Functional Performance Evaluation<br/> Percent “sick talk”/incoherence during the interview<br/> Life skills profile<br/> Global Assessment Scale<br/> Nurses’ Observation Scale for Inpatient Evaluation<br/> Disability Assessment Schedule<br/> Employment<br/> Social Behaviour Schedule<br/> Micro-Module Learning Test<br/> Assessment of Interpersonal Problem-Solving Skills<br/> Social adjustment<br/> <i>Comprehensive module test for the Basic Conversation Skills Module (BCSM)</i><br/> <i>Maryland Assessment of Social Competence (MASC)</i><br/> <i>University of California San Diego Performance-Based Skills Assessment (UPSA) - Household Chores, Communication, Finance, Transportation, Planning Recreational Activities and Total score</i><br/> <i>Quality of life interview</i><br/> <i>Work outcomes - number of jobs, weeks worked and hours worked</i></p> |
| <p><b>Speed of processing</b><br/> Trail Making Test, Parts A and B<br/> WAIS, WAIS-R, or WAIS-III digit symbol subtest<br/> Stroop Test, color and word conditions<br/> Reaction time tests<br/> Letters and category fluency</p>                                                                                                                                                                                                                                                           | <p><b>Nonverbal working memory</b><br/> Wechsler Memory Scale—Revised (WMS-R) visual span<br/> Dual span</p>                                                                                                                                                                                                                                                                                                                                                                                                                                                                          | <p><b>Cognitive measures lacking consensus</b><br/> Cognitive style<br/> Hayling Sentence Completion Task<br/> Purdue Pegboard<br/> Tactile performance<br/> WMS orientation subtest<br/> <i>General aptitude Test Battery</i></p>                                                                                                                                                                                                                                                                                                   | <p><b>Cognitive measures not considered sensitive to change</b><br/> Shipley Institute of Living Scale IQ estimate<br/> WAIS-R comprehension subtest<br/> Verbal IQ</p>                                                                                                                                                                                                                                                                                                                                                                                                                                                                                                                                                                                                                                                                                                                                                   |
| <p><b>Verbal learning and memory</b><br/> WMS, WMS-R, or WMS-III logical memory and verbal paired associates subtests<br/> California Verbal Learning Test<br/> Rey Auditory Verbal Learning Test<br/> Hopkins Verbal Learning Test<br/> Word List Recall Task<br/> Verbal learning paradigm<br/> Denman Neuropsychological Memory Test<br/> Span-Completeness Verbal Learning Test</p>                                                                                                      | <p><b>Verbal working memory</b><br/> WAIS, WAIS-R, WAIS-III, or WMS digit span<br/> WAIS-III letter-number sequencing and arithmetic subtests<br/> Digit Span Distractibility Test<br/> Other digit span tasks<br/> Trained Word Recall Task<br/> Other arithmetic tasks<br/> Sentence span<br/> Dual span<br/> Paced Auditory Serial Addition Test<br/> Denman Neuropsychological Memory Test<br/> Span-Completeness Verbal Learning Test</p>                                                                                                                                        | <p><b>Symptoms</b><br/> Scale for the Assessment of Positive Symptoms<br/> Scale for the Assessment of Negative Symptoms<br/> Positive and Negative Syndrome Scale<br/> Brief Psychiatric Rating Scale<br/> Present State Exam<br/> Paranoid Depression Scale<br/> Thought, language, and communication<br/> Holtzman Inkblot Test</p>                                                                                                                                                                                               | <p><b>Cognitive measures of multiple domains</b><br/> Global cognitive scores<br/> Mini-Mental State Examination<br/> <i>Subjective scale to assess cognition in schizophrenia</i></p>                                                                                                                                                                                                                                                                                                                                                                                                                                                                                                                                                                                                                                                                                                                                    |

**Table 2: Description of the trials of cognitive remediation in schizophrenia: sample characteristics, remediation model and dose.**

| Trial No. | Trial                                   | Sample characteristics –<br>Inpatients/Outpatients;<br>Mean age (years);<br>Mean education (years);<br>% male;<br>CGI score | % - Sz; Sz<br>Aff; Psy<br>NOS;<br>Schitypal:<br>Bipolar;<br>Mood; OCD;<br>Personality;<br>Delusional | Treatment<br>group (N)<br>at posttest | Drill and<br>practice/Drill<br>and<br>strategy<br>coaching | Cognitive<br>remediation<br>program<br>included<br>psychiatric<br>rehabilitation<br>(yes/no) | Compute<br>rised<br>(yes/no) | Control group<br>(active/passive<br>(A/P) N) at<br>posttest | Aim for the<br>duration of<br>treatment :<br>hours | Aim for<br>the<br>duration<br>of<br>treatment<br>: weeks | Intensity<br>(hours/weeks of<br>cognitive<br>remediation<br>therapy) | Country<br>(United States of<br>America = Yes) |
|-----------|-----------------------------------------|-----------------------------------------------------------------------------------------------------------------------------|------------------------------------------------------------------------------------------------------|---------------------------------------|------------------------------------------------------------|----------------------------------------------------------------------------------------------|------------------------------|-------------------------------------------------------------|----------------------------------------------------|----------------------------------------------------------|----------------------------------------------------------------------|------------------------------------------------|
| 1         | Meichenbaum<br>& Cameron(33)<br>study 2 | Inpatients; 36;<br>not reported; 100;<br>not reported                                                                       | 100;                                                                                                 | 5                                     | Drill and<br>practice                                      | No                                                                                           | No                           | 5A                                                          | 3                                                  | 4.1                                                      | 1.37                                                                 | No                                             |
| 1         | Meichenbaum<br>& Cameron(33)<br>study 1 | Inpatients; 36;<br>not reported; 100;<br>not reported                                                                       | 100;                                                                                                 | 5                                     | Drill and<br>practice                                      | No                                                                                           | No                           | 5A                                                          | 3                                                  | 4.1                                                      | 1.37                                                                 | No                                             |
| 2         | Benedict &<br>Harris(46)                | Inpatients; 30.3;<br>not reported; not<br>reported;                                                                         | 100;                                                                                                 | 10                                    | Drill and<br>practice                                      | No                                                                                           | Yes                          | 20A                                                         | 11                                                 | 12.5                                                     | 1.25                                                                 | Yes                                            |
| 3         | Olbrich &<br>Mussgay(47)                | Inpatients; 30.7;<br>10.2; 57;<br>4                                                                                         | 100;                                                                                                 | 15                                    | Drill and<br>practice                                      | No                                                                                           | No                           | 15A                                                         | 3                                                  | 12                                                       | 4                                                                    | No                                             |
| 4         | Hermanutz &<br>Gestrich(48)             | Inpatients; 30.8;<br>10.97; not reported;<br>5                                                                              | 100;                                                                                                 | 10                                    | Drill and<br>practice                                      | No                                                                                           | Yes                          | 10A                                                         | 7.5                                                | 3.5                                                      | 2.1                                                                  | No                                             |
| 5         | Benedict et<br>al(49)                   | Outpatients; 38.8;<br>11.04; 52;<br>not reported                                                                            | 100;                                                                                                 | 16                                    | Drill and<br>practice                                      | No                                                                                           | Yes                          | 17P                                                         | 11                                                 | 12.5                                                     | 3.1                                                                  | Yes                                            |
| 6         | Burda(50)                               | Inpatients; 46.6;<br>12.5; 97;<br>not reported                                                                              | 68; 32                                                                                               | 40                                    | Drill and<br>practice                                      | No                                                                                           | Yes                          | 29P                                                         | 8                                                  | 12                                                       | 1.5                                                                  | Yes                                            |
| 7         | Field(51)                               | Outpatients;28.6;<br>not reported; 90;<br>not reported                                                                      | 100                                                                                                  | 5                                     | Drill and<br>practice                                      | No                                                                                           | Yes                          | 5A                                                          | 3                                                  | 6                                                        | 2                                                                    | No                                             |
| 8         | Medalia(52)                             | Inpatients; 32.5;<br>10.8; 78;<br>3                                                                                         | 100                                                                                                  | 27                                    | Drill and<br>practice                                      | No                                                                                           | Yes                          | 27A                                                         | 6                                                  | 6                                                        | 1                                                                    | Yes                                            |
| 9         | Spaulding(53)                           | Inpatients; 35.7;<br>11.9; 63;<br>not reported                                                                              | 75;10;0;7;2;<br>1;1;1;0                                                                              | 45                                    | Drill and<br>strategy<br>coaching                          | Yes                                                                                          | No                           | 41A                                                         | 26                                                 | 96                                                       | 4                                                                    | Yes                                            |
| 10        | Wykes(54, 55)                           | Outpatients; 38.5;<br>12; 76;<br>4                                                                                          | 100                                                                                                  | 17                                    | Drill and<br>strategy<br>coaching                          | No                                                                                           | No                           | 15A                                                         | 9                                                  | 32                                                       | 3.2                                                                  | No                                             |
| 11        | Medalia(56,<br>57)* treatment<br>1      | Inpatients; 36.3;<br>10.5; 59;<br>4                                                                                         | 76;24                                                                                                | 18                                    | Drill and<br>practice                                      | No                                                                                           | Yes                          | 18P                                                         | 5                                                  | 4.17                                                     | 0.83                                                                 | Yes                                            |

| Trial No. | Trial                              | Sample characteristics – Inpatients/Outpatients; Mean age (years); Mean education (years); % male; CGI score | % - Sz; Sz Aff; Psy NOS; Schitypal; Bipolar; Mood; OCD; Personality; Delusional | Treatment group (N) at posttest | Drill and practice/Drill and strategy coaching | Cognitive remediation program included psychiatric rehabilitation (yes/no) | Computerised (yes/no) | Control group (active/passive (A/P) N) at posttest | Aim for the duration of treatment : hours | Aim for the duration of treatment : weeks | Intensity (hours/weeks of cognitive remediation therapy) | Country (United States of America = Yes) |
|-----------|------------------------------------|--------------------------------------------------------------------------------------------------------------|---------------------------------------------------------------------------------|---------------------------------|------------------------------------------------|----------------------------------------------------------------------------|-----------------------|----------------------------------------------------|-------------------------------------------|-------------------------------------------|----------------------------------------------------------|------------------------------------------|
| 12        | Bell et al. (2001-2005*)(2, 58-62) | Outpatients; 41.3; 13.25; 78; 4                                                                              | -                                                                               | 18                              | Drill and practice                             | Yes                                                                        | Yes                   | 18A                                                | 36                                        | 26                                        | 1.38                                                     | Yes                                      |
| 13        | Hadas-Lidor(63)                    | Outpatients; 36; not reported; 60.3; not reported                                                            | 100                                                                             | 29                              | Drill and strategy coaching                    | No                                                                         | No                    | 29A                                                | 130                                       | 52                                        | 2.5                                                      | No                                       |
| 14        | Medalia(64) treatment 2            | Inpatients; 36.3; 11.5; 59; 4                                                                                | 74;24                                                                           | 18                              | Drill and strategy coaching                    | No                                                                         | Yes                   | 18P                                                | 5                                         | 4.17                                      | 0.83                                                     | Yes                                      |
| 15        | Belluci(65)                        | Outpatients; 42; 12.6; 47; not reported                                                                      | 47;53                                                                           | 17                              | Drill and practice                             | No                                                                         | Yes                   | 17P                                                | 8                                         | 8                                         | 1                                                        | Yes                                      |
| 16        | Van der Gaag(66)                   | Inpatients; 31.05; not reported; 64; not reported                                                            | 100                                                                             | 21                              | Drill and strategy coaching                    | Yes                                                                        | No                    | 21A                                                | 8                                         | 12                                        | 0.66                                                     | No                                       |
| 17        | Lopez-Luengo & Vazquez(67)         | Outpatients; 33.6; not reported; 83; 3                                                                       | 100                                                                             | 13                              | Drill and practice                             | No                                                                         | No                    | 11P                                                | 43                                        | 24                                        | 0.56                                                     | No                                       |
| 18        | Hogarty(68, 69)                    | Outpatients; 37.3; not reported; 59; not reported                                                            | 70;30                                                                           | 61                              | Drill and strategy coaching                    | Yes                                                                        | Yes                   | 46A                                                | 75                                        | 104                                       | 0.72                                                     | Yes                                      |
| 19        | Ueland & Rund(22, 70)              | Inpatients; 15.3; not reported; 50; 5                                                                        | 62;11;4;8;11;4;0;0;0                                                            | 14                              | Drill and strategy coaching                    | No                                                                         | No                    | 11A                                                | 12                                        | 30                                        | 2.5                                                      | No                                       |
| 20        | McGurk(3, 4)                       | Outpatients; 35.6; 11.2; 55; not reported                                                                    | 73;4;0;0;0;2;3;0;0;0                                                            | 23                              | Drill and strategy coaching                    | Yes                                                                        | Yes                   | 21A                                                | 12                                        | 24                                        | 3.4                                                      | Yes                                      |
| 21        | Sartory(42)                        | Inpatients; 31.9; 10.3; 67; not reported                                                                     | 100                                                                             | 21                              | Drill and practice                             | No                                                                         | Yes                   | 21P                                                | 15                                        | 3                                         | 5                                                        | No                                       |
| 22        | Silverstein(71)                    | Inpatients; 39.3; 10.6; 87; not reported                                                                     | 100                                                                             | 18                              | Drill and practice                             | Yes                                                                        | No                    | 13A                                                | 18                                        | 6                                         | 3                                                        | Yes                                      |
| 23        | Vauth et al.(72)                   | Inpatients; 28.8; 12.5; 65; 2                                                                                | 100                                                                             | 37                              | Drill and strategy                             | Yes                                                                        | Yes                   | 35A                                                | 24                                        | 8                                         | 3                                                        | No                                       |
| 24        | Wolwer(73)                         | Inpatients; 34.3; not reported; 78; 3                                                                        | 100                                                                             | 14                              | Drill and practice                             | No                                                                         | Yes                   | 19A                                                | 6                                         | 9                                         | 1.5                                                      | No                                       |
| 25        | Penades(74)                        | Outpatients; 36.2;                                                                                           | 100                                                                             | 16                              | Drill and                                      |                                                                            |                       | 17A                                                | 16                                        | 40                                        | 2.5                                                      | No                                       |

| Trial No. | Trial                      | Sample characteristics – Inpatients/Outpatients; Mean age (years); Mean education (years); % male; CGI score | % - Sz; Sz Aff; Psy NOS; Schitypal; Bipolar; Mood; OCD; Personality; Delusional | Treatment group (N) at posttest | Drill and practice/Drill and strategy coaching | Cognitive remediation program included psychiatric rehabilitation (yes/no) | Computerised (yes/no) | Control group (active/passive (A/P) N) at posttest | Aim for the duration of treatment : hours | Aim for the duration of treatment : weeks | Intensity (hours/weeks of cognitive remediation therapy) | Country (United States of America = Yes) |
|-----------|----------------------------|--------------------------------------------------------------------------------------------------------------|---------------------------------------------------------------------------------|---------------------------------|------------------------------------------------|----------------------------------------------------------------------------|-----------------------|----------------------------------------------------|-------------------------------------------|-------------------------------------------|----------------------------------------------------------|------------------------------------------|
|           |                            | 10.2; 57; 2                                                                                                  |                                                                                 |                                 | strategy coaching                              | No                                                                         | No                    |                                                    |                                           |                                           |                                                          |                                          |
| 26        | Wykes, Newton et al.(23)   | Inpatients; 18.2; not reported;65;3                                                                          | 100                                                                             | 21                              | Drill and strategy coaching                    | No                                                                         | No                    | 19P                                                | 12                                        | 40                                        | 3.33                                                     | No                                       |
| 27        | Wykes, Reeder et al.(44)   | Both; 36; not reported; 73; 3                                                                                | 100                                                                             | 41                              | Drill and strategy coaching                    | No                                                                         | No                    | 39P                                                | 12                                        | 40                                        | 3.33                                                     | No                                       |
| 28        | Greig et al.(75, 76)       | Outpatients;40.4; 12.73; 53; 4                                                                               | 66;34                                                                           | 33                              | Drill and practice                             | Yes                                                                        | Yes                   | 29A                                                | 126                                       | 34                                        | 3.9                                                      | Yes                                      |
| 29        | Kurtz et al.(77)           | Outpatients;35.0; 13.15; 67; not reported                                                                    | -                                                                               | 23                              | Drill and practice                             | No                                                                         | Yes                   | 19A                                                | 100                                       | 52                                        | 1.92                                                     | Yes                                      |
| 30        | Redoblado-Hodge et al.(78) | Both; 31.3; 11; 60; 3                                                                                        | 100                                                                             | 22                              | Drill and strategy coaching                    | No                                                                         | Yes                   | 18P                                                | 24                                        | 12                                        | 2                                                        | No                                       |
| 31        | Twamley et al.(79)         | Outpatients;48.3; 13; 65.8; 4                                                                                | 47;47;5;0;0; 0;0;0;0                                                            | 14                              | Strategy coaching alone                        | No                                                                         | No                    | 20P                                                | 24                                        | 12                                        | 2                                                        | Yes                                      |
| 32        | Lindenmayer et al.(82)     | Inpatients; 43.5; 10.63; 89; 4                                                                               | -                                                                               | 43                              | Drill and practice                             | Yes                                                                        | Yes                   | 35A                                                | 24                                        | 12                                        | 2                                                        | Yes                                      |
| 33        | Cavallaro et al.(80)       | Outpatients;33.2; 11.65; not reported; 3                                                                     | -                                                                               | 50                              | Drill and practice                             | No                                                                         | Yes                   | 36A                                                | 36                                        | 12                                        | 3                                                        | No                                       |
| 34        | Kern et al.(81)            | Outpatients;47.6; 12.4; 30; 5                                                                                | -                                                                               | 13                              | Strategy coaching alone                        | No                                                                         | No                    | 8A                                                 | 24                                        | 12                                        | 2                                                        | Yes                                      |
| 35        | Silverstein et al.(83)     | Inpatients; 39.0; 11.34; 61; not reported                                                                    | 100                                                                             | 47                              | Strategy coaching alone                        | Yes                                                                        | No                    | 35A                                                | 34                                        | 17                                        | 2                                                        | Yes                                      |
| 36        | Fisher et al.(31, 84)      | Outpatients;44.0; 13.38; 73; 2                                                                               | 100                                                                             | 29                              | Drill and practice                             | No                                                                         | Yes                   | 26A                                                | 50                                        | 10                                        | 5                                                        | Yes                                      |
| 37        | Lecardeur et al.(41)       | Outpatients;43; 12.5; 75; 3                                                                                  | 63;33;0;0;0; 0;0;0;4                                                            | 8                               | Strategy coaching alone                        | No                                                                         | No                    | 8A                                                 | 10                                        | 5                                         | 2                                                        | No                                       |
| 38        | Dickinson et al.(21)       | Both; 47.6; 12.5; 70; 3                                                                                      | 78;22                                                                           | 30                              | Drill and strategy coaching                    | No                                                                         | Yes                   | 20A                                                | 15                                        | 36                                        | 3                                                        | Yes                                      |

| Trial No. | Trial           | Sample characteristics –<br>Inpatients/Outpatients;<br>Mean age (years);<br>Mean education (years);<br>% male;<br>CGI score | % - Sz; Sz<br>Aff; Psy<br>NOS;<br>Schitypal:<br>Bipolar;<br>Mood; OCD;<br>Personality;<br>Delusional | Treatment<br>group (N)<br>at posttest | Drill and<br>practice/Drill<br>and<br>strategy<br>coaching | Cognitive<br>remediation<br>program<br>included<br>psychiatric<br>rehabilitation<br>(yes/no) | Compute<br>rised<br>(yes/no) | Control group<br>(active/passive<br>(A/P) N) at<br>posttest | Aim for the<br>duration of<br>treatment :<br>hours | Aim for<br>the<br>duration<br>of<br>treatment<br>: weeks | Intensity<br>(hours/weeks of<br>cognitive<br>remediation<br>therapy) | Country<br>(United States of<br>America = Yes) |
|-----------|-----------------|-----------------------------------------------------------------------------------------------------------------------------|------------------------------------------------------------------------------------------------------|---------------------------------------|------------------------------------------------------------|----------------------------------------------------------------------------------------------|------------------------------|-------------------------------------------------------------|----------------------------------------------------|----------------------------------------------------------|----------------------------------------------------------------------|------------------------------------------------|
| 39        | Eack et al.(85) | Outpatients; 25.9;<br>not reported; 69.5;<br>4                                                                              | 66;34                                                                                                | 31                                    | Drill and<br>strategy<br>coaching                          | Yes                                                                                          | Yes                          | 27A                                                         | 60                                                 | 104                                                      | 0.58                                                                 | Yes                                            |



**Figure 1: Funnel plots representing global cognition, symptom and functioning effect sizes against precision (standard error [se] of effect size).**

**2a: Global cognition**

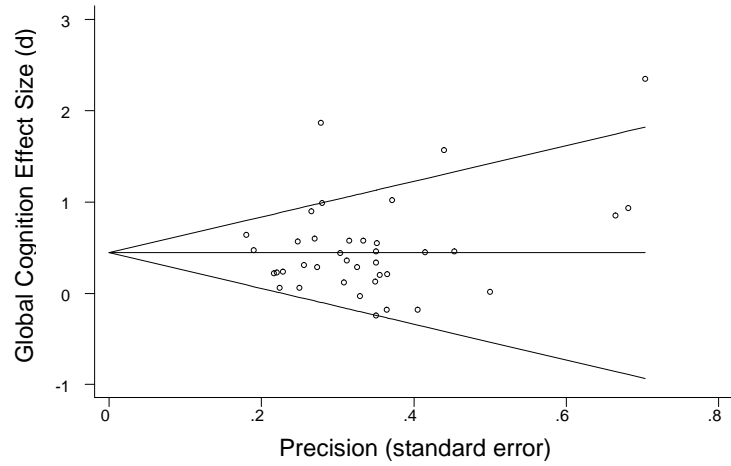

**2b: Symptoms**

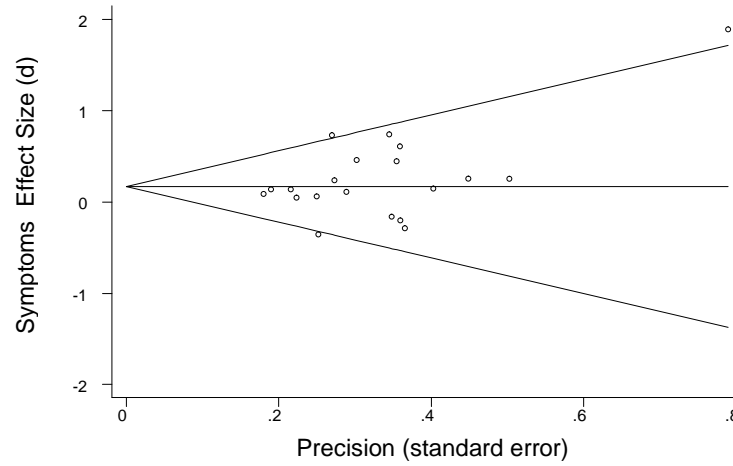

**2c: Functioning**

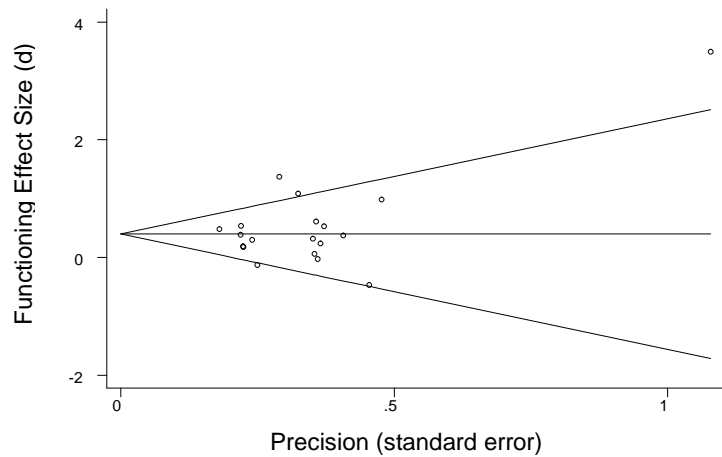

Supplement: ajp_168_05_472_01.pdf [file ajp_168_05_472_01.pdf]
